# Supplementary material
Source: PubMed Central journal article supplement (PMC4542040)

**A**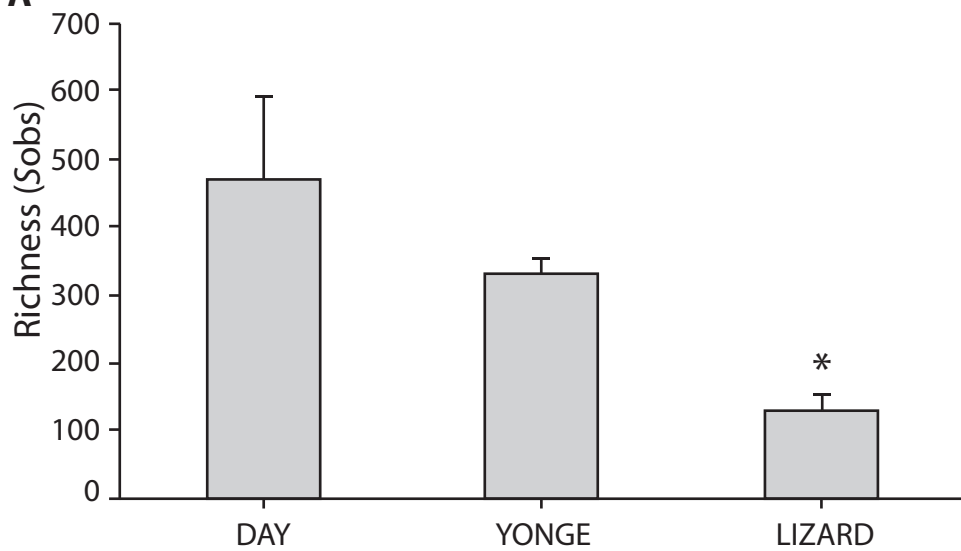**B**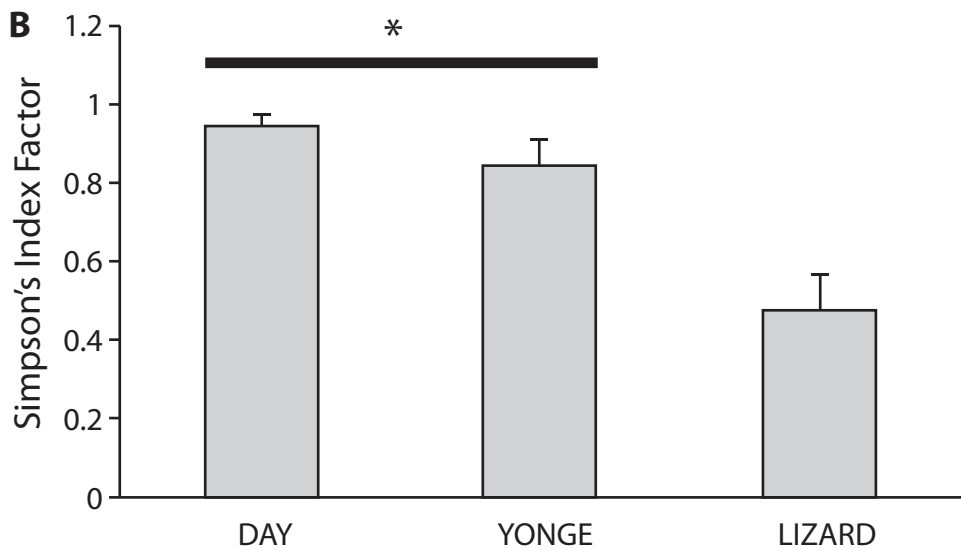

Supplement: ismej20153x2.pdf [file ismej20153x2.pdf]

**Back Reef**

**Yonge Reef  
2008**

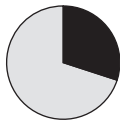

2 m (n = 10)

**Yonge Reef  
2012**

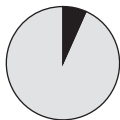

2 m (n = 15)

**Day Reef  
2012**

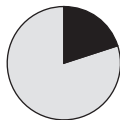

2 m (n = 15)

**Upper Slope**

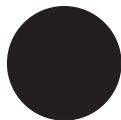

6 m (n = 10)

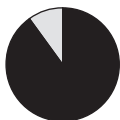

9 m (n = 10)

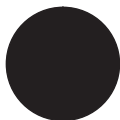

10 m (n = 15)

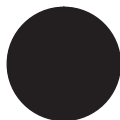

10 m (n = 15)

**Deep Slope**

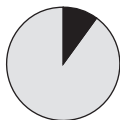

27 m (n = 10)

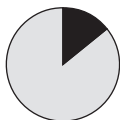

40 m (n = 14)

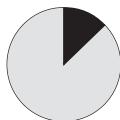

40 m (n = 15)

Supplement: ismej20153x3.pdf [file ismej20153x3.pdf]
